# Supplementary material for: Modelling the circularly and linearly polarised spectrum of [Ni(en)3]2+
Source: Royal Society of Chemistry journal article supplement (doi:10.1039/c2dt12319c), 2012-01-01
Supplement: c2dt12319c.pdf [file c2dt12319c.pdf]

**Table 1.** Coordinates for the BP86 optimised geometry of  $[\text{Ni}(\text{en})_3]^{2+}$ .

| Atom | Coordinates (Å) |       |       |
|------|-----------------|-------|-------|
|      | x               | y     | z     |
| Ni   | 0.00            | 0.00  | 0.00  |
| N    | -1.63           | -0.75 | 1.19  |
| C    | -2.87           | -0.05 | 0.76  |
| H    | -3.78           | -0.57 | 1.10  |
| H    | -2.87           | 0.95  | 1.20  |
| H    | -1.75           | -1.76 | 1.06  |
| H    | -1.49           | -0.61 | 2.19  |
| N    | 1.46            | -1.04 | 1.19  |
| N    | 0.17            | 1.79  | 1.19  |
| N    | 1.46            | 1.04  | -1.19 |
| N    | 0.17            | -1.79 | -1.19 |
| N    | -1.63           | 0.75  | -1.19 |
| C    | -2.87           | 0.05  | -0.76 |
| C    | 1.48            | -2.46 | 0.76  |
| H    | 2.39            | -0.64 | 1.06  |
| H    | 1.27            | -0.98 | 2.19  |
| C    | 1.39            | 2.52  | 0.76  |
| H    | -0.65           | 2.39  | 1.06  |
| H    | 0.22            | 1.59  | 2.19  |
| C    | 1.48            | 2.46  | -0.76 |
| H    | 2.39            | 0.64  | -1.06 |
| H    | 1.27            | 0.98  | -2.19 |
| C    | 1.39            | -2.52 | -0.76 |
| H    | -0.65           | -2.39 | -1.06 |
| H    | 0.22            | -1.59 | -2.19 |
| H    | -1.75           | 1.76  | -1.06 |
| H    | -1.49           | 0.61  | -2.19 |
| H    | -3.78           | 0.57  | -1.10 |
| H    | -2.87           | -0.95 | -1.20 |
| H    | 2.38            | -2.99 | 1.10  |
| H    | 0.61            | -2.96 | 1.20  |
| H    | 1.40            | 3.56  | 1.10  |
| H    | 2.26            | 2.01  | 1.20  |
| H    | 2.38            | 2.99  | -1.10 |
| H    | 0.61            | 2.96  | -1.20 |
| H    | 1.40            | -3.56 | -1.10 |
| H    | 2.26            | -2.01 | -1.20 |

**Table 2.** Selected bond lengths (Å) and bond angles (°) for the BP86 optimised structure  $[\text{Ni}(\text{en})_3]^{2+}$  and a comparison with those determined crystallographically<sup>1</sup> for  $[\text{Ni}(\text{en})_3](\text{NO}_3)_2$

| bond length |       |            | bond angle |       |            |
|-------------|-------|------------|------------|-------|------------|
|             | BP86  | experiment |            | BP86  | experiment |
| Ni-N        | 2.152 | 2.130      | N-Ni-N     | 81.3  | 81.9       |
| N-C         | 1.484 | 1.476      | Ni-N-C     | 108.3 | 108.1      |
| C-C         | 1.520 | 1.490      | N-C-C      | 108.7 | 110.0      |
| N-H         | 1.02  | 0.82       |            |       |            |
| C-H         | 1.10  | 1.02       |            |       |            |

<sup>1</sup> Korp, J. D., Bernal, I., Palmer, R. A., & Robinson, J. C. (1980). On the absolute configuration of the tris(ethylenediamine)nickel(II) cation. I. The structure and absolute configuration of (-)- $[\text{Ni}(\text{en})_3](\text{NO}_3)_2$ . *Acta Crystallographica Section B*, 36(3), 560-564.
